# Supplementary material for: A QM:MM model for the interaction of DNA nucleotides with carbon nanotubes
Source: Royal Society of Chemistry journal article supplement (doi:10.1039/c4cp05222f), 2015-01-01
Supplement: c4cp05222f1.pdf [file c4cp05222f1.pdf]

**Supporting information for:**

**A QM:MM Model for the Interaction of DNA**

**Nucleotides with Carbon Nanotube**

Morteza Chehel Amirani and Tian Tang\*

*Department of Mechanical Engineering, University of Alberta, Edmonton, AB, Canada*

E-mail: [tian.tang@ualberta.ca](mailto:tian.tang@ualberta.ca)

---

\*To whom correspondence should be addressed

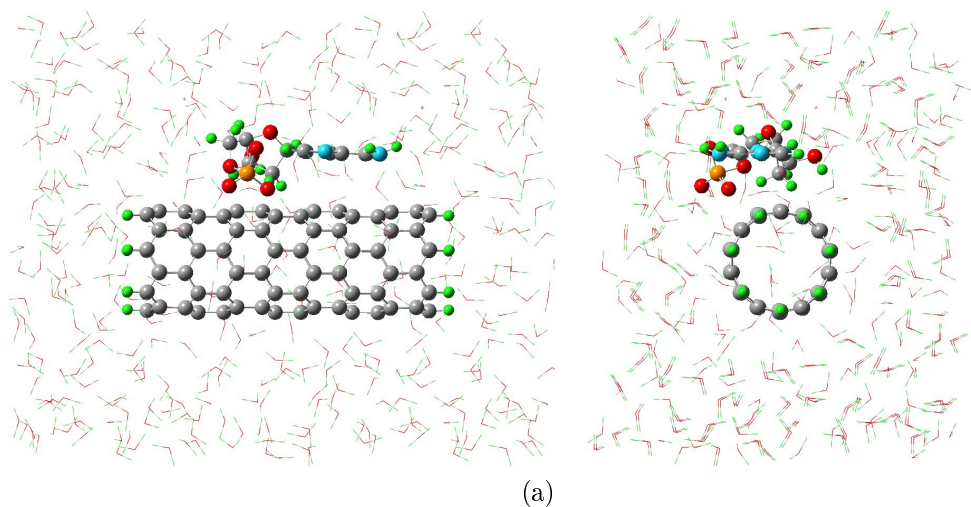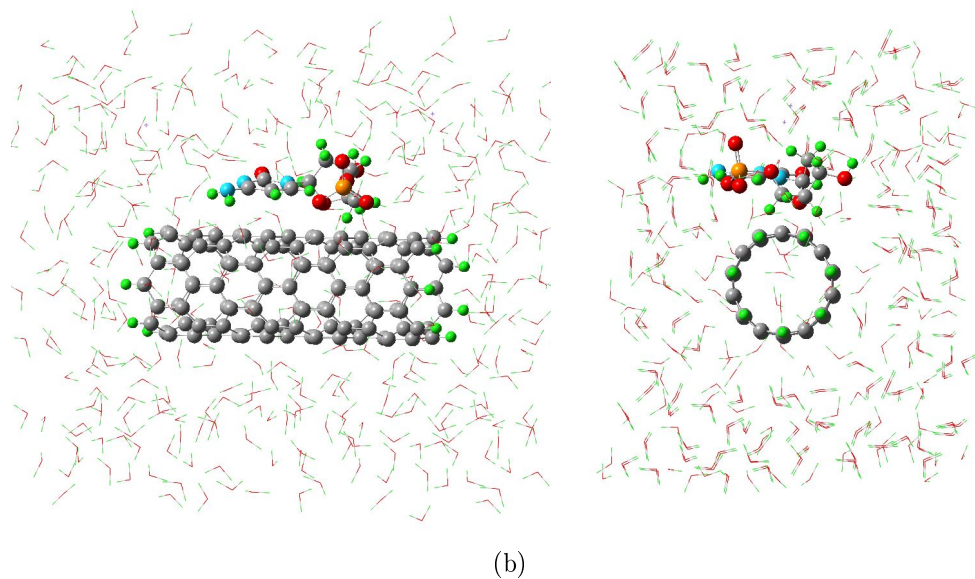

Figure S1: Initial configuration of NMP-CNT systems in solution: (a) AMP-(7,0) CNT, (b) CMP-(7,0) CNT, (c) GMP-(7,0) CNT, (d) TMP-(7,0) CNT, (e) AMP-(4,4) CNT, (f) CMP-(4,4) CNT, (g) GMP-(4,4) CNT, and (h) TMP-(4,4) CNT; left and right figures are respectively front and side view.

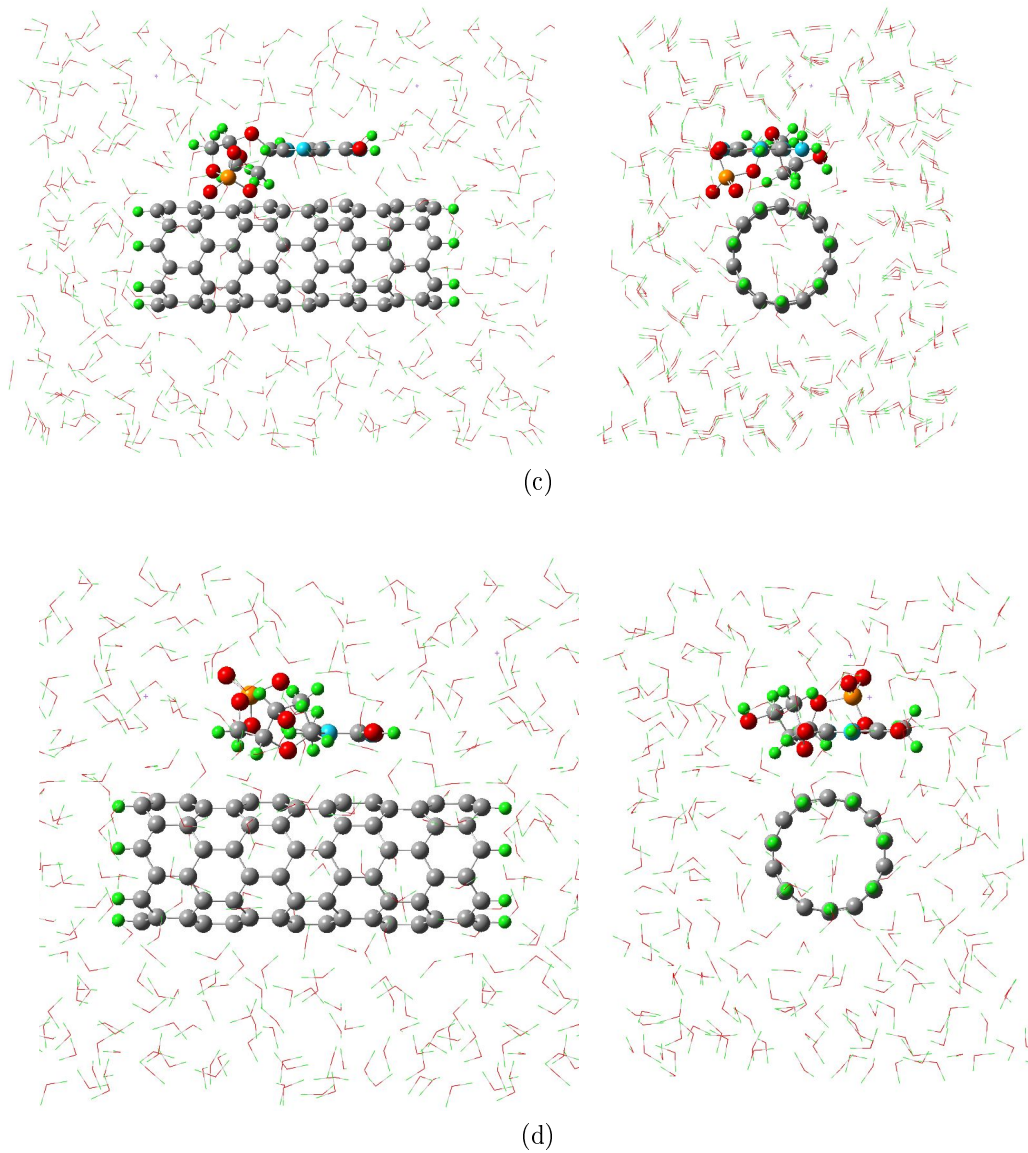

Figure S1: Initial configuration of NMP-CNT systems in solution: (a) AMP-(7,0) CNT, (b) CMP-(7,0) CNT, (c) GMP-(7,0) CNT, (d) TMP-(7,0) CNT, (e) AMP-(4,4) CNT, (f) CMP-(4,4) CNT, (g) GMP-(4,4) CNT, and (h) TMP-(4,4) CNT; left and right figures are respectively front and side view.

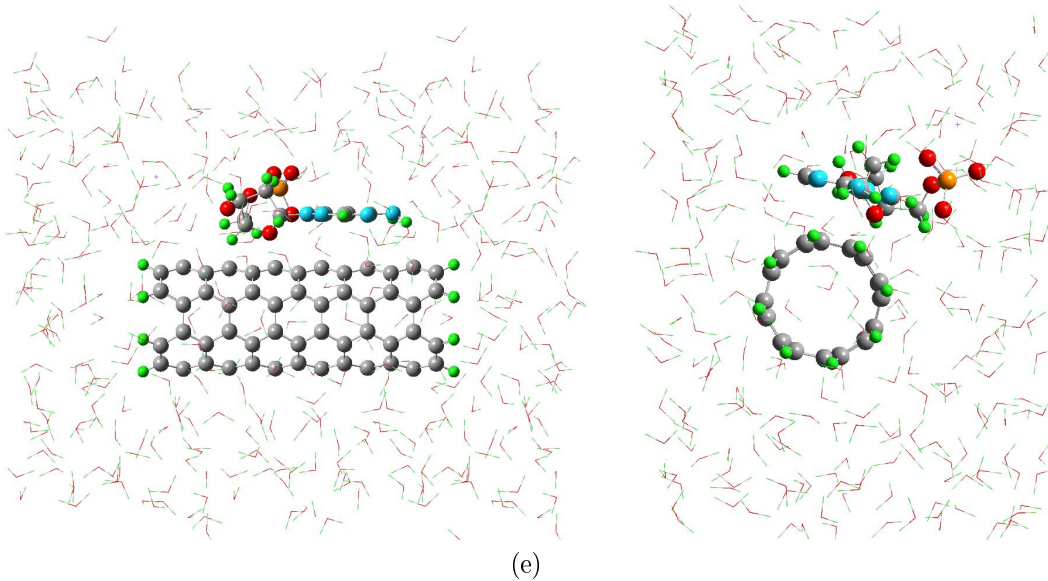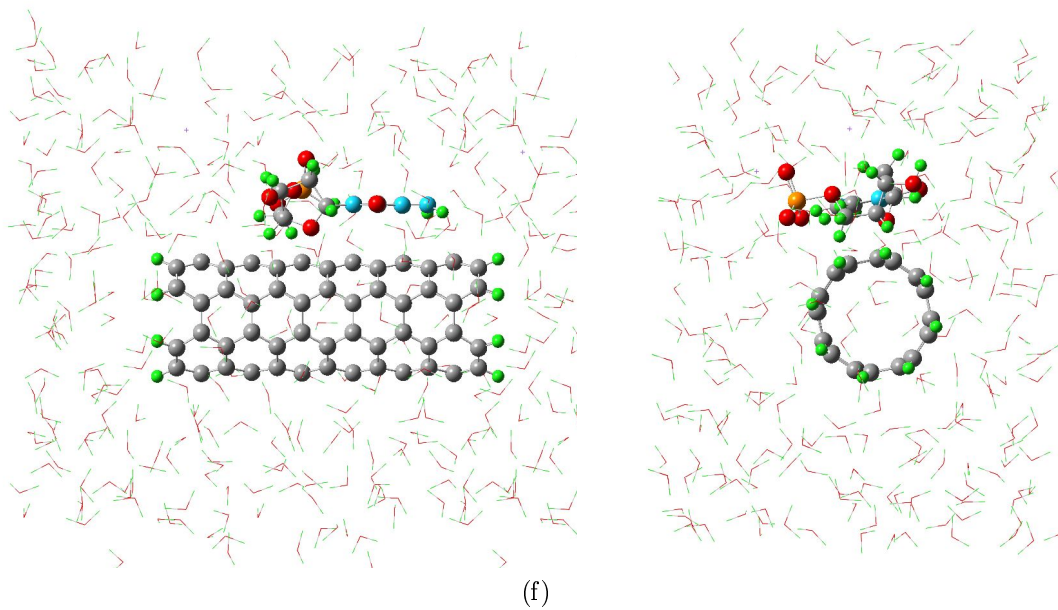

Figure S1: Initial configuration of NMP-CNT systems in solution: (a) AMP-(7,0) CNT, (b) CMP-(7,0) CNT, (c) GMP-(7,0) CNT, (d) TMP-(7,0) CNT, (e) AMP-(4,4) CNT, (f) CMP-(4,4) CNT, (g) GMP-(4,4) CNT, and (h) TMP-(4,4) CNT; left and right figures are respectively front and side view.

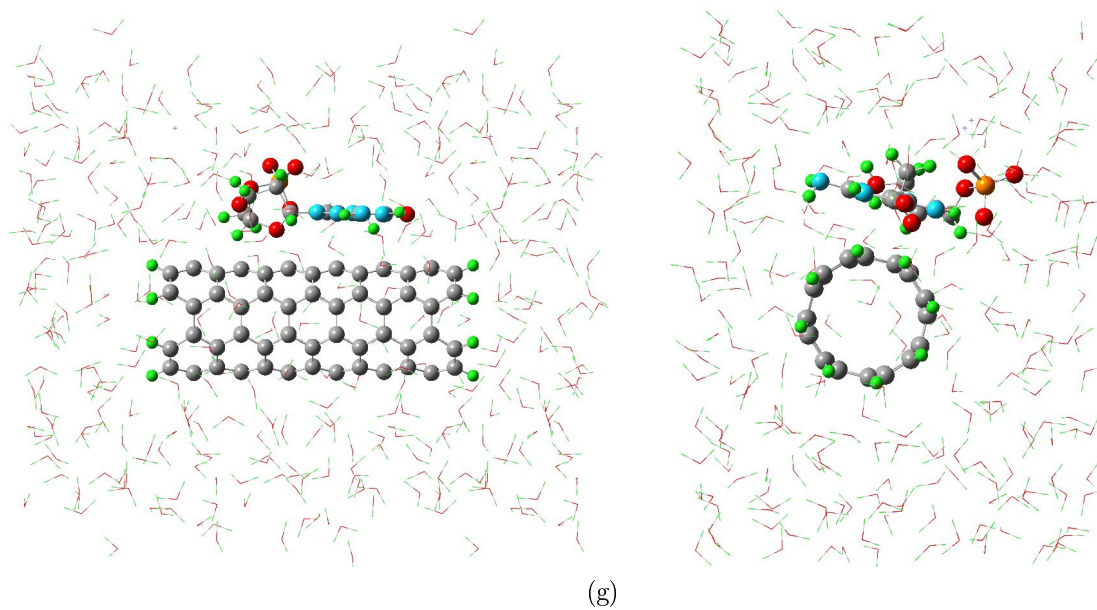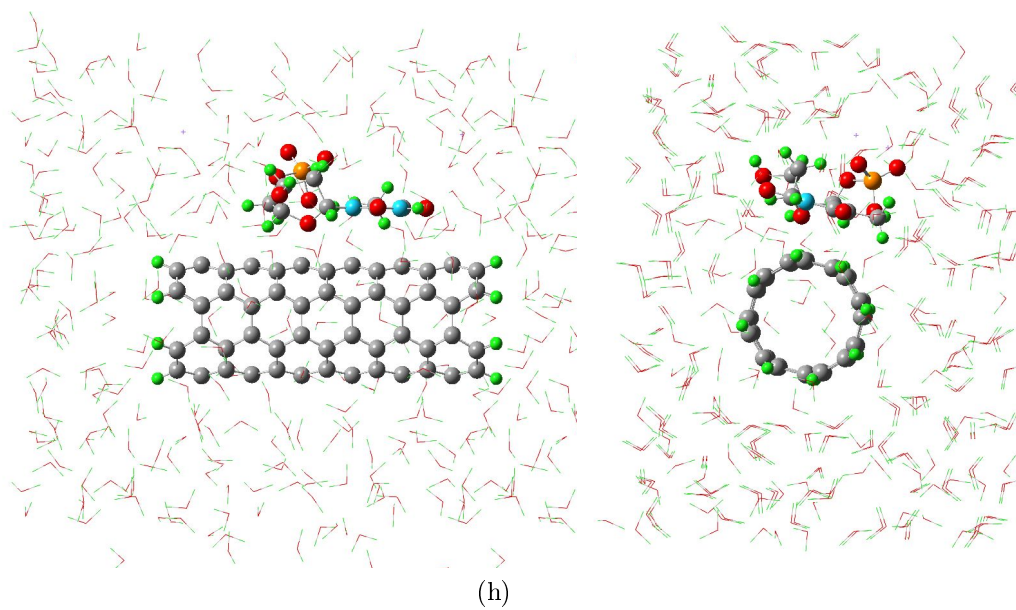

Figure S1: Initial configuration of NMP-CNT systems in solution: (a) AMP-(7,0) CNT, (b) CMP-(7,0) CNT, (c) GMP-(7,0) CNT, (d) TMP-(7,0) CNT, (e) AMP-(4,4) CNT, (f) CMP-(4,4) CNT, (g) GMP-(4,4) CNT, and (h) TMP-(4,4) CNT; left and right figures are respectively front and side view.

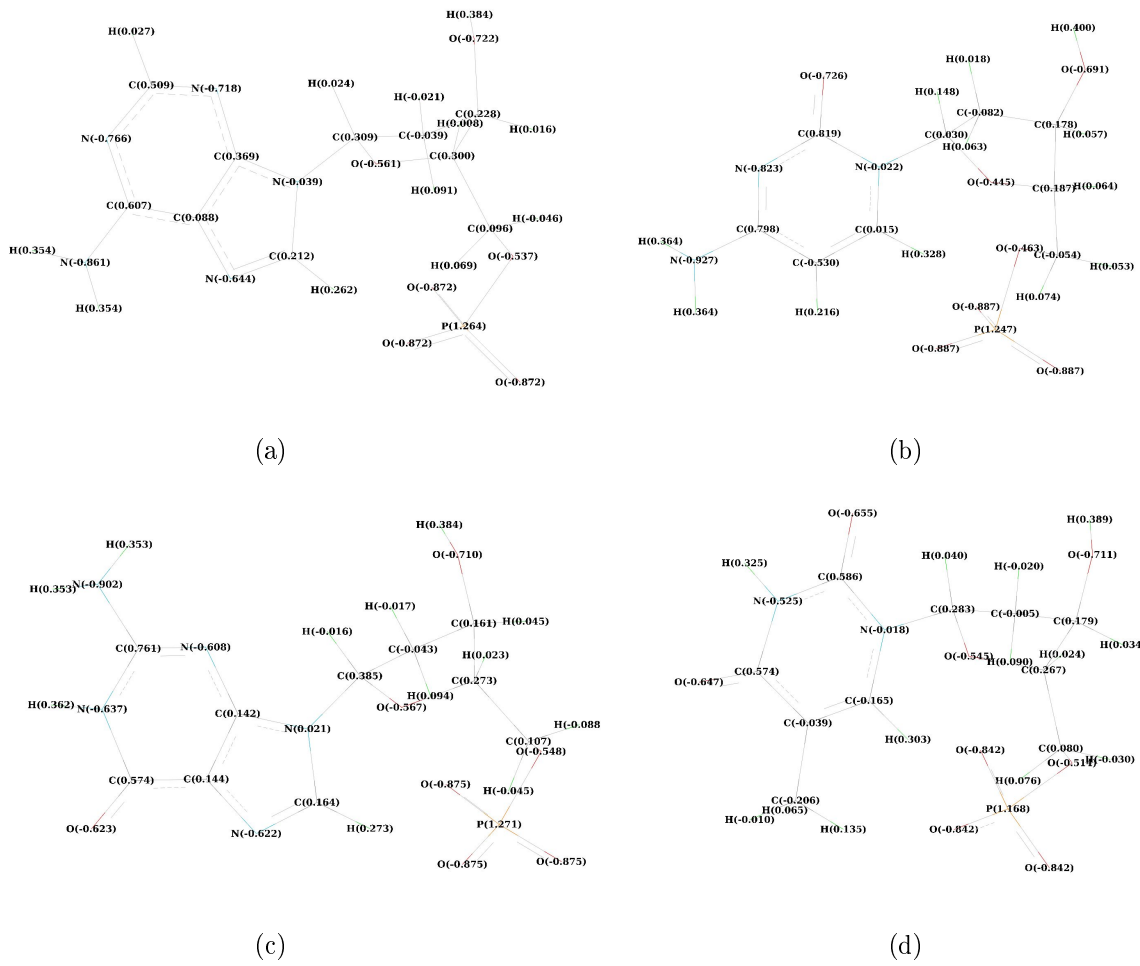

Figure S2: Atomic partial charges: (a) AMP, (b) CMP, (c) GMP, (d) TMP, (e) (4,4) CNT, and (f) (7,0) CNT.

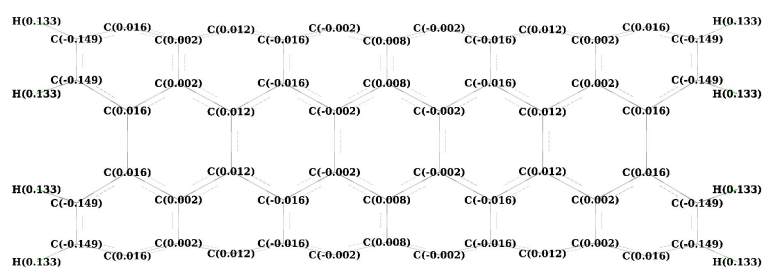

(e)

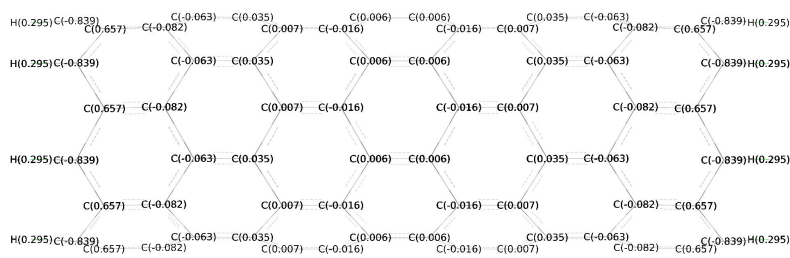

(f)

Figure S2: Atomic partial charges: (a) AMP, (b) CMP, (c) GMP, (d) TMP, (e) (4,4) CNT, and (f) (7,0) CNT.

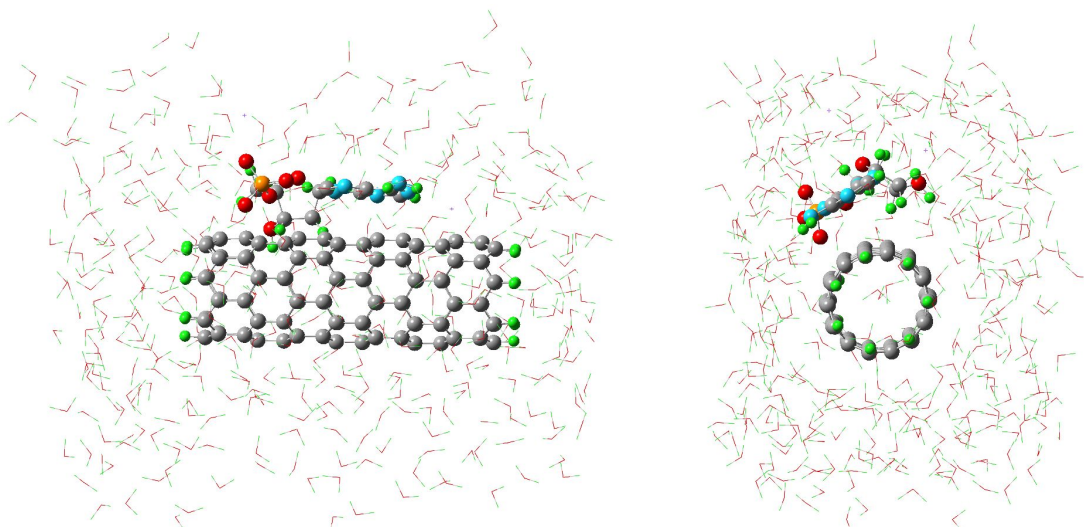

(a)

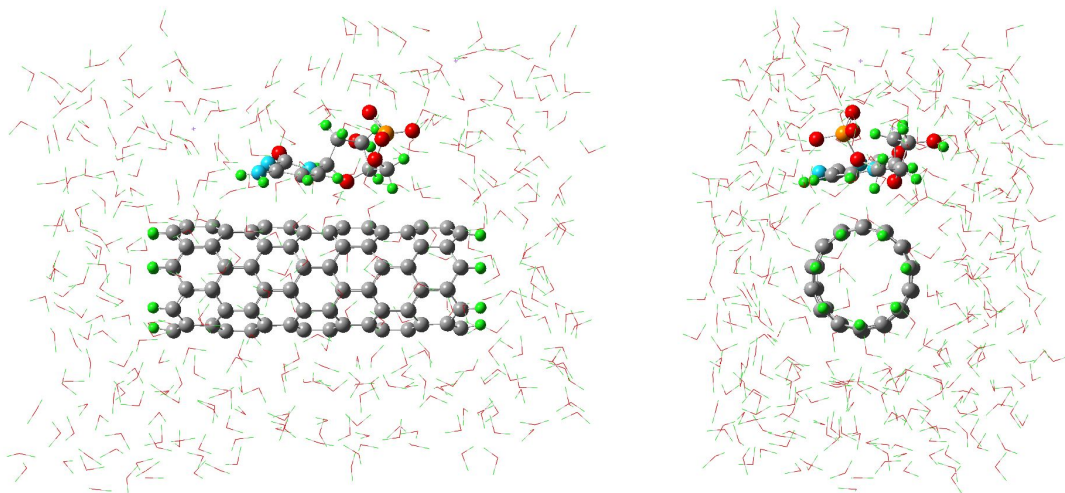

(b)

Figure S3: Final optimized configuration of NMP-CNT systems in solution: (a) AMP-(7,0) CNT, (b) CMP-(7,0) CNT, (c) GMP-(7,0) CNT, (d) TMP-(7,0) CNT, (e) AMP-(4,4) CNT, (f) CMP-(4,4) CNT, (g) GMP-(4,4) CNT, and (h) TMP-(4,4) CNT; left and right figures are respectively front and side view.



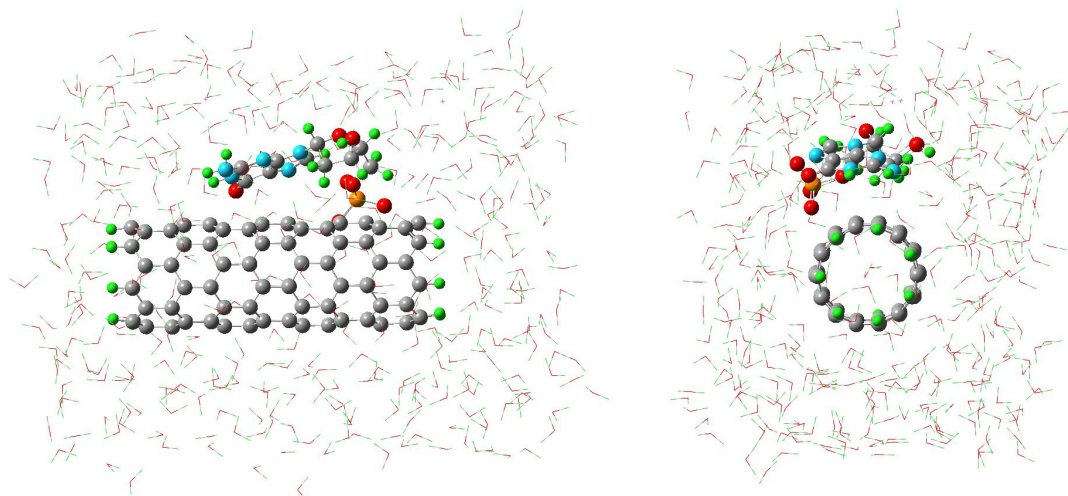

(c)

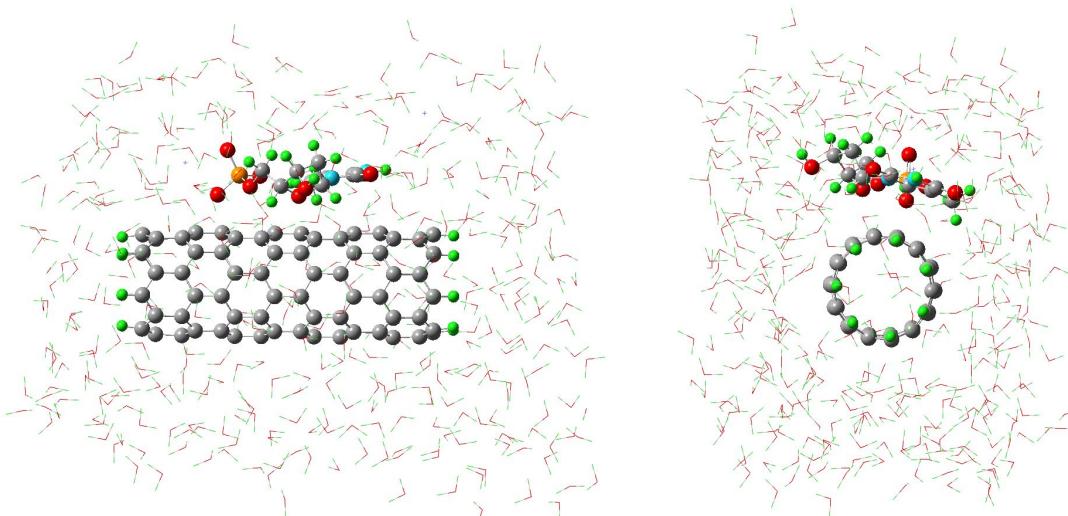

(d)

Figure S3: Final optimized configuration of NMP-CNT systems in solution: (a) AMP-(7,0) CNT, (b) CMP-(7,0) CNT, (c) GMP-(7,0) CNT, (d) TMP-(7,0) CNT, (e) AMP-(4,4) CNT, (f) CMP-(4,4) CNT, (g) GMP-(4,4) CNT, and (h) TMP-(4,4) CNT; left and right figures are respectively front and side view.

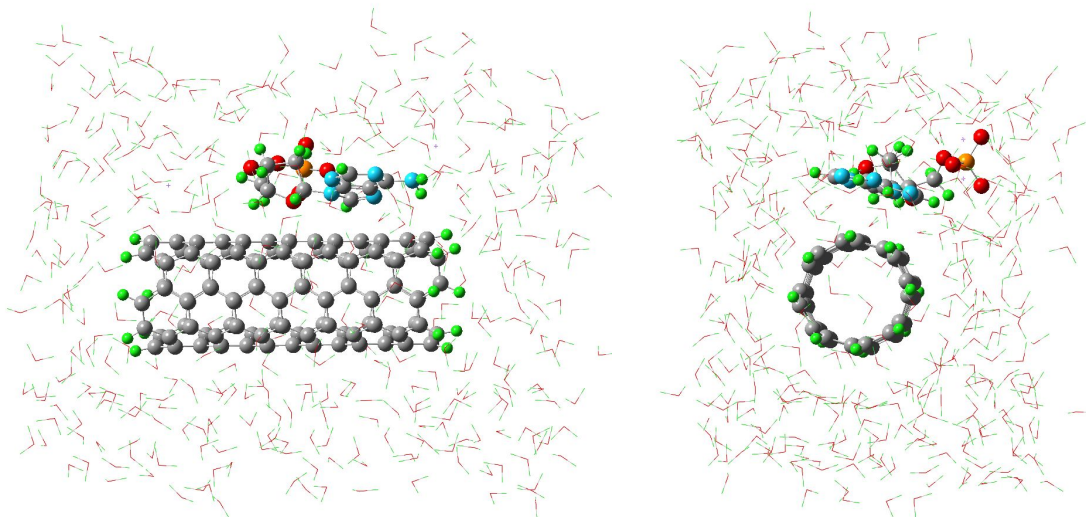

(e)

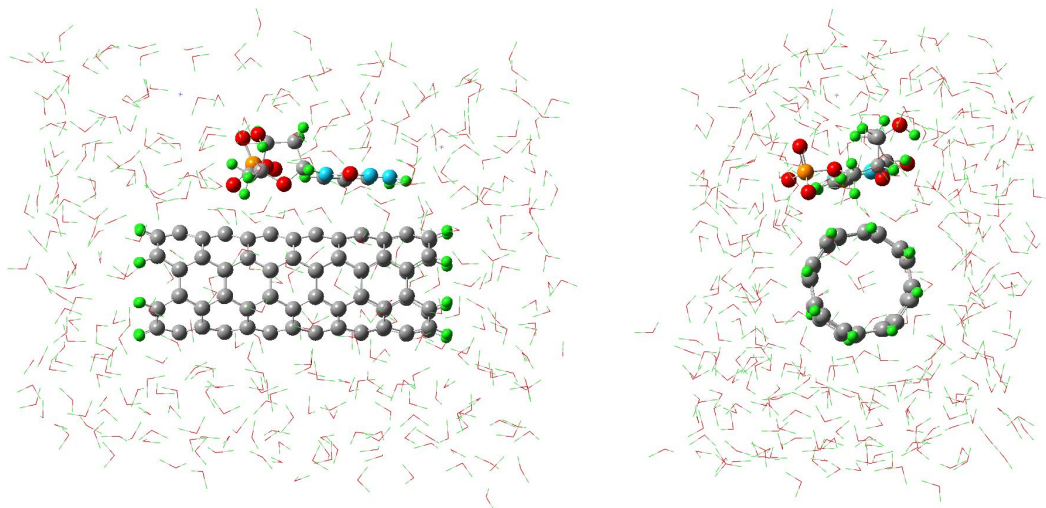

(f)

Figure S3: Final optimized configuration of NMP-CNT systems in solution: (a) AMP-(7,0) CNT, (b) CMP-(7,0) CNT, (c) GMP-(7,0) CNT, (d) TMP-(7,0) CNT, (e) AMP-(4,4) CNT, (f) CMP-(4,4) CNT, (g) GMP-(4,4) CNT, and (h) TMP-(4,4) CNT; left and right figures are respectively front and side view.

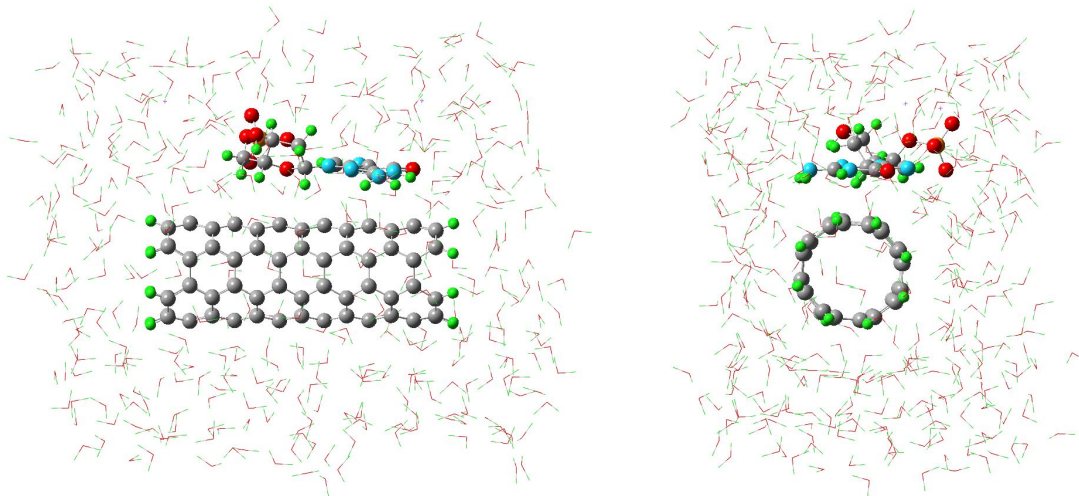

(g)

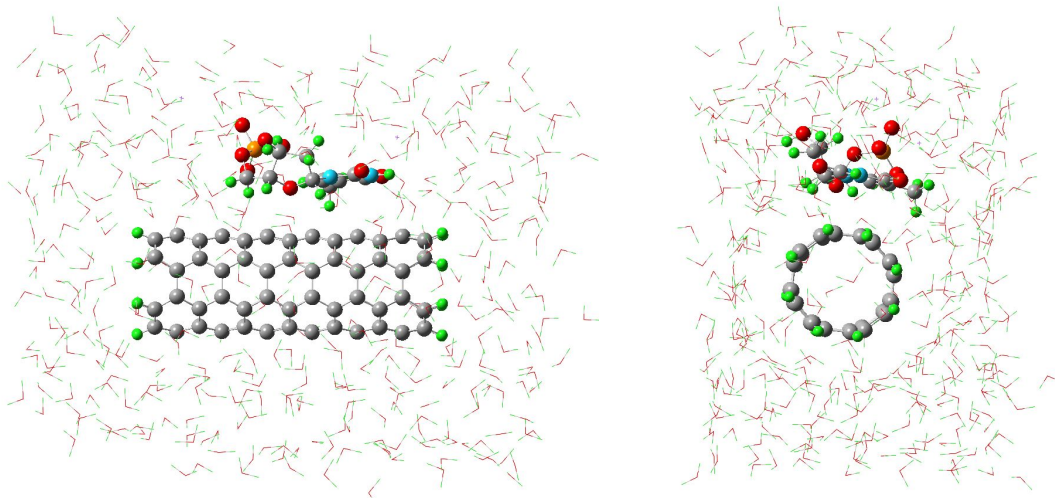

(h)

Figure S3: Final optimized configuration of NMP-CNT systems in solution: (a) AMP-(7,0) CNT, (b) CMP-(7,0) CNT, (c) GMP-(7,0) CNT, (d) TMP-(7,0) CNT, (e) AMP-(4,4) CNT, (f) CMP-(4,4) CNT, (g) GMP-(4,4) CNT, and (h) TMP-(4,4) CNT; left and right figures are respectively front and side view.
